# Supplementary material for: pH-responsive polymeric vesicles from branched copolymers
Source: Royal Society of Chemistry journal article supplement (doi:10.1039/c9ra08703f), 2019-01-01
Supplement: c9ra08703f1.pdf [file c9ra08703f1.pdf]

# Supporting information

## pH-responsive polymeric vesicles from branched copolymers

Jinglun Zhou <sup>1,3</sup>, Linlin Li, <sup>2,\*</sup> Weishan Wang, <sup>2</sup> Yang Zhao, <sup>2</sup> and Shengyu Feng <sup>1,\*</sup>

<sup>1</sup> Key Laboratory of Special Functional Aggregated Materials (Shandong University), Ministry of Education, School of Chemistry and Chemical Engineering, Shandong University, Jinan, 250100, China; tianzhuangzjl@126.com

<sup>2</sup> Shandong Institute for Product Quality Inspection, Jinan, 250100, China; wwshh1982@163.com (W.W.); 116102238@163.com (Y.Z.)

<sup>3</sup> Eco-Benign Plastics Technology Company Limited, Jinan, 250101, China; tianzhuangzjl@126.com

\* Correspondence: fsy@sdu.edu.cn; lilinlin1003@163.com.

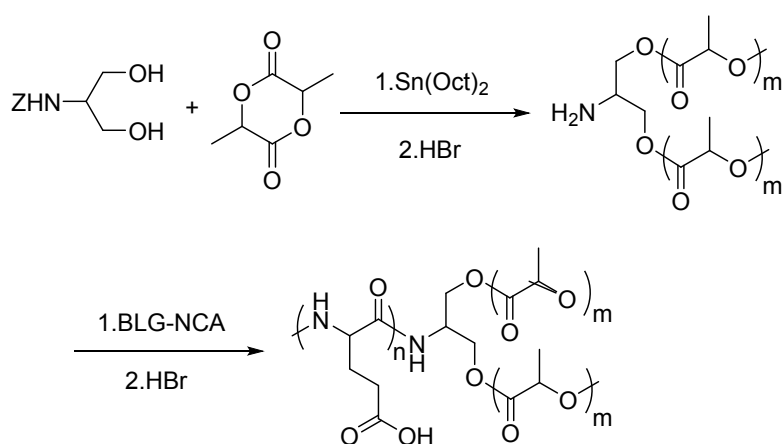

**Scheme S1.** Synthesis of branched copolymer PLLA<sub>2</sub>-PBLG.

**Table S1.** Molecular weight characterization of the polymers

| Polymers                                  | feed ratio <sup>a</sup> | Mn <sup>b</sup> (kDa) | Mn <sup>c</sup> (kDa) | Disperity ( <i>D</i> ) <sup>c</sup> |
|-------------------------------------------|-------------------------|-----------------------|-----------------------|-------------------------------------|
| PLLA <sub>2</sub> -NH-Z                   | 1:60                    | 4.3                   | 7.3                   | 1.12                                |
| PLLA <sub>2</sub> -NH <sub>2</sub>        | --                      | 4.3                   | 7.3                   | 1.12                                |
| PLLA <sub>2(30)</sub> -PBLG <sub>10</sub> | 60:15                   | 6.5                   | 9.7                   | 1.21                                |
| PLLA <sub>2(30)</sub> -PBLG <sub>55</sub> | 60:60                   | 16.4                  | 22.6                  | 1.19                                |

<sup>a</sup>Feed molar ratio of initiator/monomer. <sup>b</sup>Calculated from <sup>1</sup>H NMR spectra.

<sup>c</sup>Determined from GPC.
